# Supplementary material for: A vital role for PICK1 in the differential regulation of metabotropic glutamate receptor internalization and synaptic AMPA receptor endocytosis
Source: PubMed Central journal article supplement (PMC10276164; doi:10.1016/j.jbc.2023.104837), 2023-05-18
Supplement: mmc1.pdf [file mmc1.pdf]

## **Supporting Information**

### **A vital role for PICK1 in the differential regulation of metabotropic glutamate receptor internalization and synaptic AMPA receptor endocytosis**

Namrata Ramsakha, Prachi Ojha, Subhajit Pal, Sanjeev Routh, Ami Citri and  
Samarjit Bhattacharyya

List of materials included:

1. Figure S1
2. Figure S2
3. Table of p values

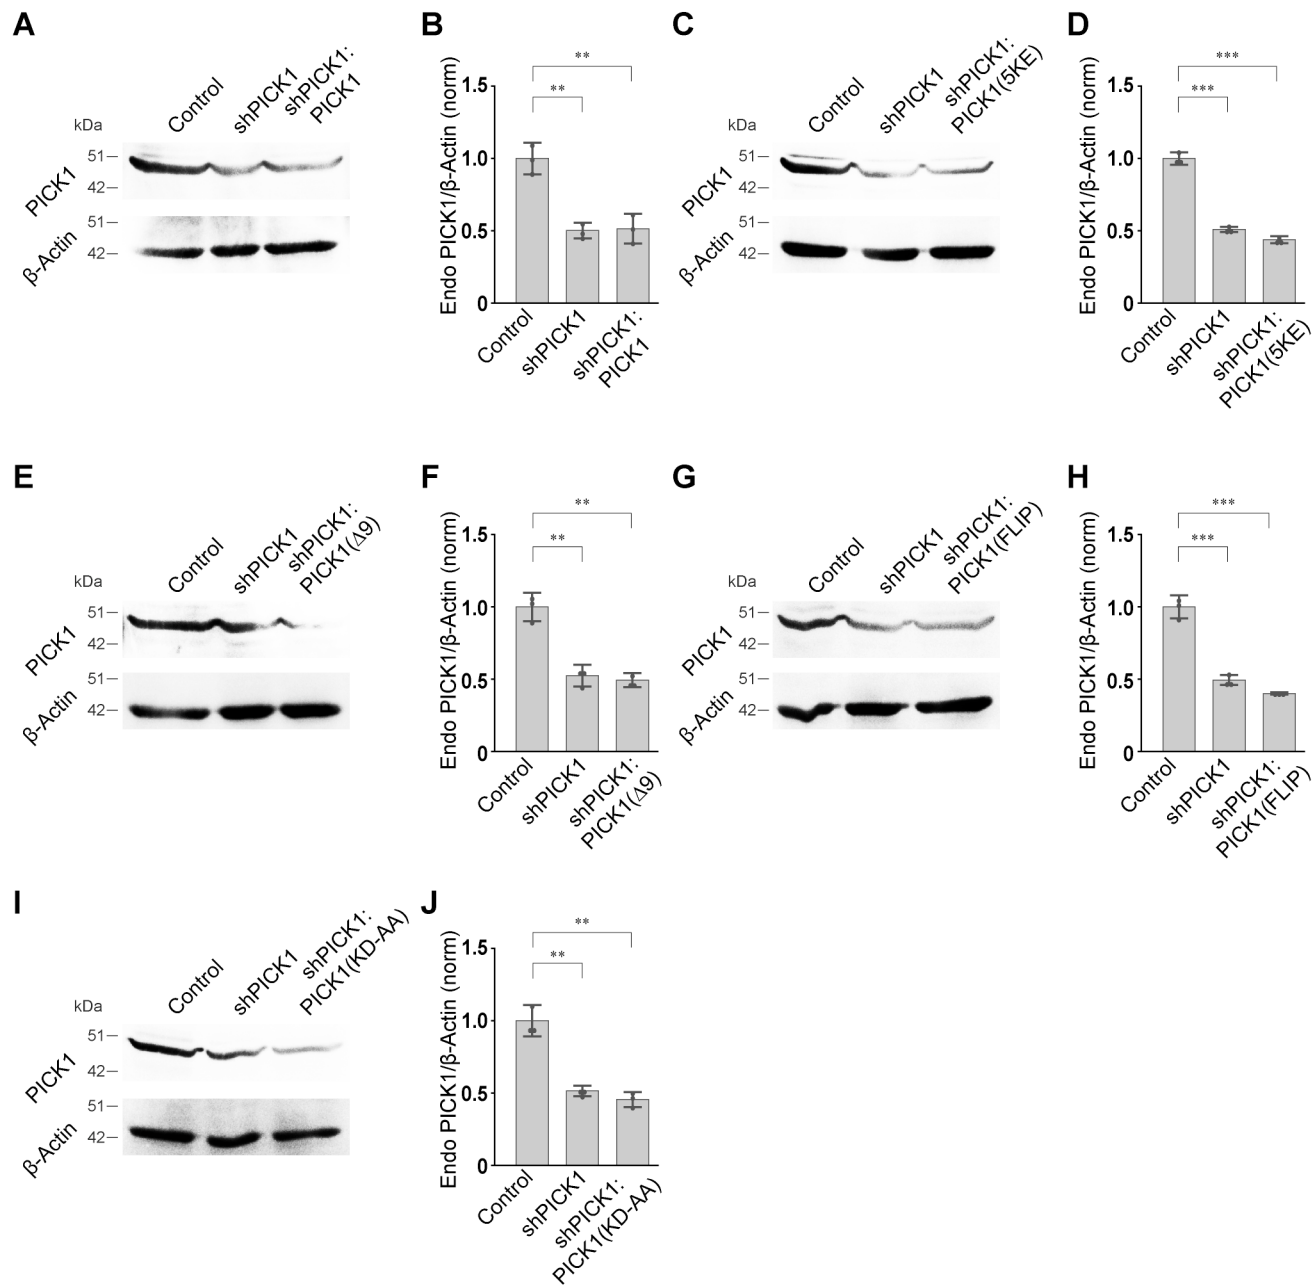

Figure S1

**Figure S1. Knockdown of endogenous PICK1 by shPICK1 and PICK1 replacement constructs.** (A, B) Western blot (A) and quantitation of western blots (B), showing knockdown of the endogenous PICK1 by shPICK1 and full-length PICK1 replacement construct (N = 3). (C, D) Acute knockdown of endogenous PICK1 by shPICK1 and PICK1(5KE) replacement construct, as shown by the western blot (C) and quantitation of the western blots (D) (N = 3). (E, F) Western blot (E) and quantitation of western blots (F) showing the acute knockdown of endogenous PICK1 by shPICK1 and PICK1( $\Delta$ 9) replacement construct (N = 3). (G, H) Acute knockdown of endogenous PICK1 by shPICK1 and PICK1(FLIP) replacement construct represented by western blot (G) and quantitation of western blots (H) (N = 3). (I, J) Representative western blot (I) and quantitation of western blots (J) showing the knockdown of endogenous PICK1 by shPICK1 and PICK1(KD-AA) replacement construct (N = 3). Results are presented as means  $\pm$  SD. \*\*\*,  $p < 0.001$ ; \*\*,  $p < 0.01$ .

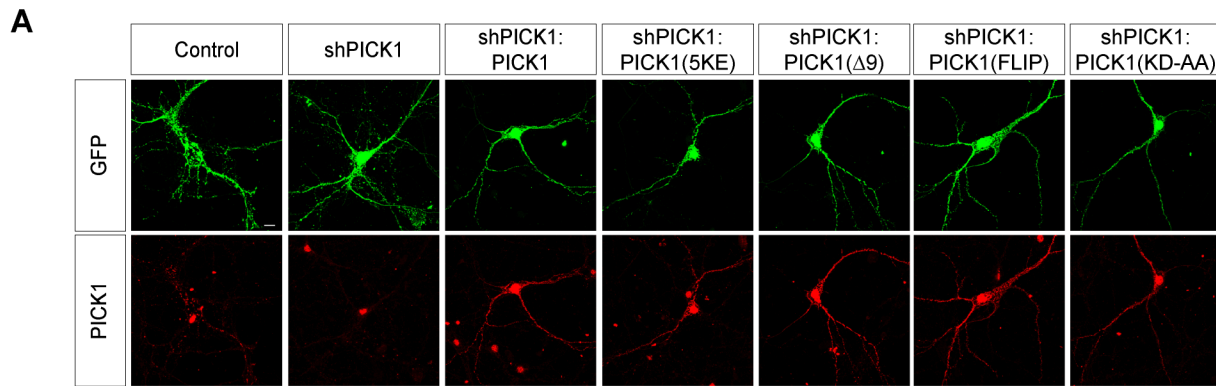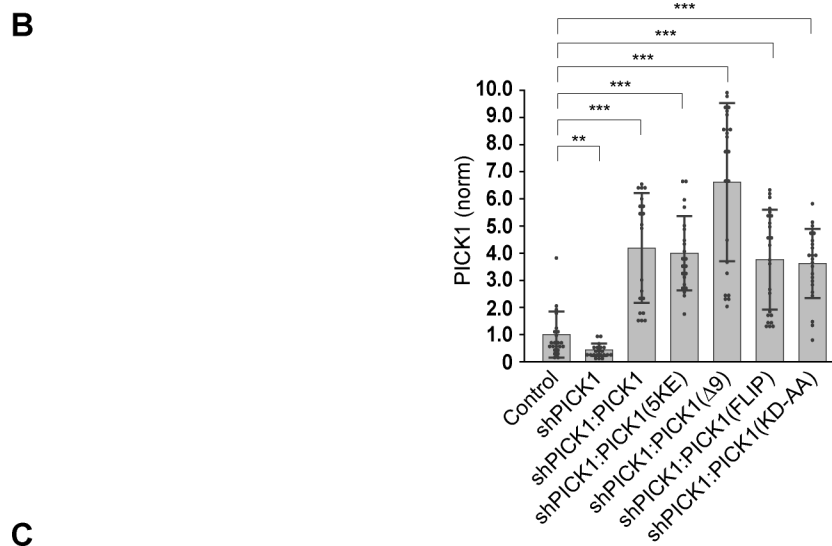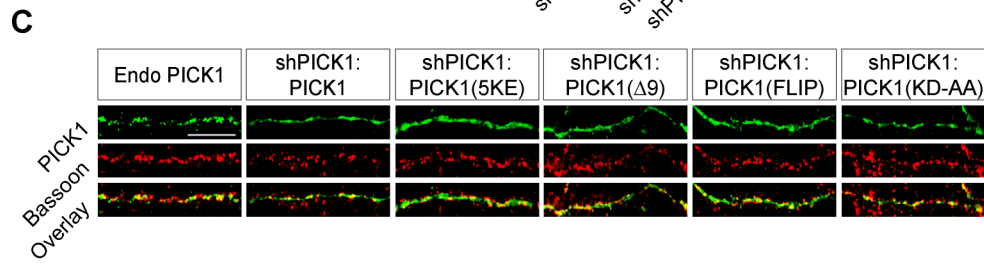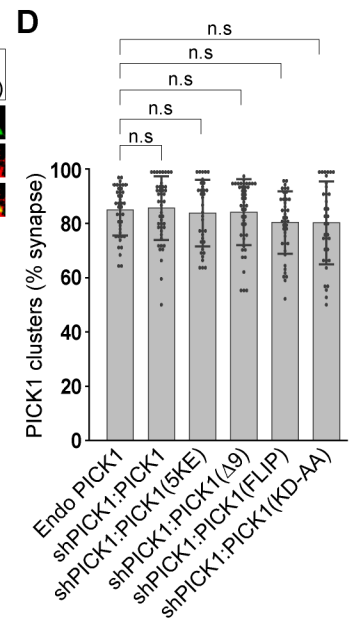

Figure S2

**Figure S2. Expression and synaptic localization of PICK1 constructs.** (A, B) Representative images (A) and quantitation (B) showing that shPICK1 knocked down the endogenous PICK1 and all the replacement constructs used in this study viz., wild-type PICK1, PICK1(5KE), PICK1( $\Delta$ 9), PICK1(FLIP) and PICK1(KD-AA) expressed properly (Number of dendrites: control = 23; shPICK1 = 21; shPICK1:PICK1 = 20; shPICK1:PICK1(5KE) = 22; shPICK1:PICK1( $\Delta$ 9) = 23; shPICK1:PICK1(FLIP) = 24; shPICK1:PICK1(KD-AA) = 23) (For immunostaining following antibodies were used: in the upper panels of (A) antibodies against GFP were used for all the conditions and for the lower panels of (A) antibodies against PICK1 were used for all the conditions). (C) Representative images showing the colocalization of Bassoon with various mutants of PICK1 (For immunostaining following antibodies were used: in the upper left panel of endo PICK1 condition antibody against PICK1 was used and in all other conditions in the upper panels antibodies against GFP were used. For the middle panels, antibodies against Bassoon were used for all the conditions). All the constructs of PICK1 were observed to colocalize with Bassoon similar to endogenous PICK1. (D) Quantitation also suggested that all the constructs of PICK1 were localized at the synapse to the similar extent compared to endogenous PICK1 (Number of dendrites: endo PICK1 = 40; shPICK1:PICK1 = 45; shPICK1:PICK1(5KE) = 35; shPICK1:PICK1( $\Delta$ 9) = 45; shPICK1:PICK1(FLIP) = 41; shPICK1:PICK1(KD-AA) = 35). Results are presented as means  $\pm$  SD. Scale bar, 10  $\mu$ m. \*\*\*,  $p < 0.001$ ; \*\*,  $p < 0.01$ ; n.s,  $p > 0.05$ .

**p values**

| <b>Figure</b> | <b>Groups</b>                                                | <b>p value</b>          |
|---------------|--------------------------------------------------------------|-------------------------|
| Figure 1C     | Between control and shPICK1                                  | $5.926 \times 10^{-15}$ |
|               | Between control and shPICK1:PICK1                            | 0.705                   |
| Figure 1E     | Between control and control + DHPG                           | $1.054 \times 10^{-13}$ |
|               | Between control + DHPG and shPICK1 + DHPG                    | $1.723 \times 10^{-10}$ |
|               | Between control + DHPG and shPICK1:PICK1 + DHPG              | 0.739                   |
| Figure 1G     | Between control and DHPG                                     | 0.775                   |
| Figure 2C     | Between control and shPICK1                                  | $5.325 \times 10^{-11}$ |
|               | Between control and shPICK1:PICK1(5KE)                       | $3.845 \times 10^{-10}$ |
| Figure 2E     | Between control and control + DHPG                           | $3.832 \times 10^{-17}$ |
|               | Between control + DHPG and shPICK1 + DHPG                    | $6.887 \times 10^{-16}$ |
|               | Between control + DHPG and shPICK1:PICK1(5KE) + DHPG         | $7.69 \times 10^{-15}$  |
| Figure 3C     | Between control and shPICK1                                  | $2.975 \times 10^{-9}$  |
|               | Between control and shPICK1:PICK1( $\Delta$ 9)               | $9.966 \times 10^{-15}$ |
| Figure 3E     | Between control and control + DHPG                           | $3.142 \times 10^{-24}$ |
|               | Between control + DHPG and shPICK1 + DHPG                    | $1.882 \times 10^{-18}$ |
|               | Between control + DHPG and shPICK1:PICK1( $\Delta$ 9) + DHPG | $6.457 \times 10^{-14}$ |
| Figure 4C     | Between control and shPICK1                                  | $2.664 \times 10^{-13}$ |
|               | Between control and shPICK1:PICK1(FLIP)                      | $1.033 \times 10^{-14}$ |
| Figure 4E     | Between control and control + DHPG                           | $6.077 \times 10^{-12}$ |
|               | Between control + DHPG and shPICK1 + DHPG                    | $6.839 \times 10^{-14}$ |
|               | Between control + DHPG and shPICK1:PICK1(FLIP)               | $1.023 \times 10^{-10}$ |

|           |                                                                      |                         |
|-----------|----------------------------------------------------------------------|-------------------------|
|           | + DHPG                                                               |                         |
| Figure 5C | Between control and shPICK1                                          | $1.221 \times 10^{-15}$ |
|           | Between control and shPICK1:PICK1(KD-AA)                             | $1.213 \times 10^{-14}$ |
| Figure 5E | Between control and control + DHPG                                   | $8.115 \times 10^{-12}$ |
|           | Between control + DHPG and shPICK1 + DHPG                            | $7.983 \times 10^{-14}$ |
|           | Between control + DHPG and shPICK1:PICK1(KD-AA) + DHPG               | $6.809 \times 10^{-8}$  |
| Figure 6B | Between untreated and DHPG                                           | 0.004                   |
|           | Between 2.5 hr untreated and 2.5 hr DHPG                             | 0.011                   |
| Figure 6D | Between untreated and DHPG                                           | 0.001                   |
|           | Between 2.5 hr untreated and 2.5 hr DHPG                             | 0.008                   |
| Figure 6F | Between untreated and DHPG                                           | $1.104 \times 10^{-13}$ |
|           | Between 2.5 hr untreated and 2.5 hr DHPG                             | $4.8 \times 10^{-11}$   |
|           | Between 2.5 hr (OA + FK-506) untreated and 2.5 hr (OA + FK-506) DHPG | 0.388                   |
| Figure 6H | Between untreated and DHPG                                           | $1.136 \times 10^{-7}$  |
|           | Between 2.5 hr untreated and 2.5 hr DHPG                             | $6.224 \times 10^{-15}$ |
|           | Between 2.5 hr (OA + FK-506) untreated and 2.5 hr (OA + FK-506) DHPG | 0.858                   |
| Figure 7B | Between control and shPICK1                                          | 0.007                   |
|           | Between control and shPICK1:PICK1                                    | 0.315                   |
| Figure 7D | Between control and control + DHPG                                   | $5.378 \times 10^{-24}$ |
|           | Between control + DHPG and shPICK1 + DHPG                            | 0.571                   |
|           | Between control + DHPG and shPICK1:PICK1 + DHPG                      | 0.656                   |
|           |                                                                      |                         |

|            |                                                                      |                         |
|------------|----------------------------------------------------------------------|-------------------------|
| Figure 8B  | Between untreated and DHPG                                           | 0.033                   |
|            | Between 2.5 hr untreated and 2.5 hr DHPG                             | 0.028                   |
| Figure 8D  | Between untreated and DHPG                                           | 0.006                   |
|            | Between 2.5 hr untreated and 2.5 hr DHPG                             | 0.99                    |
| Figure 8F  | Between untreated and DHPG                                           | $2.061 \times 10^{-7}$  |
|            | Between 2.5 hr untreated and 2.5 hr DHPG                             | $4.3 \times 10^{-9}$    |
|            | Between 2.5 hr (OA + FK-506) untreated and 2.5 hr (OA + FK-506) DHPG | 0.007                   |
| Figure 8H  | Between untreated and DHPG                                           | $3.589 \times 10^{-13}$ |
|            | Between 2.5 hr untreated and 2.5 hr DHPG                             | 0.341                   |
|            | Between 2.5 hr (OA + FK-506) untreated and 2.5 hr (OA + FK-506) DHPG | 0.596                   |
| Figure S1B | Between control and shPICK1                                          | 0.002                   |
|            | Between control and shPICK1:PICK1                                    | 0.005                   |
| Figure S1D | Between control and shPICK1                                          | $5.334 \times 10^{-5}$  |
|            | Between control and shPICK1:PICK1(5KE)                               | $3.747 \times 10^{-5}$  |
| Figure S1F | Between control and shPICK1                                          | 0.003                   |
|            | Between control and shPICK1:PICK1( $\Delta 9$ )                      | 0.001                   |
| Figure S1H | Between control and shPICK1                                          | $5.322 \times 10^{-4}$  |
|            | Between control and shPICK1:PICK1(FLIP)                              | $2.042 \times 10^{-4}$  |
| Figure S1J | Between control and shPICK1                                          | 0.002                   |
|            | Between control and shPICK1:PICK1(KD-AA)                             | 0.001                   |
| Figure S2B | Between control and shPICK1                                          | 0.005                   |
|            | Between control and shPICK1:PICK1                                    | $2.252 \times 10^{-8}$  |
|            | Between control and shPICK1:PICK1(5KE)                               | $2.699 \times 10^{-11}$ |
|            |                                                                      |                         |



|            |                                                |                         |
|------------|------------------------------------------------|-------------------------|
|            | Between control and shPICK1:PICK1( $\Delta$ 9) | $2.388 \times 10^{-11}$ |
|            | Between control and shPICK1:PICK1(FLIP)        | $4.839 \times 10^{-8}$  |
|            | Between control and shPICK1:PICK1(KD-AA)       | $1.962 \times 10^{-10}$ |
| Figure S2D | Between endo PICK1 and wt-PICK1                | 0.768                   |
|            | Between endo PICK1 and PICK1(5KE)              | 0.642                   |
|            | Between endo PICK1 and PICK1( $\Delta$ 9)      | 0.75                    |
|            | Between endo PICK1 and PICK1(FLIP)             | 0.052                   |
|            | Between endo PICK1 and PICK1(KD-AA)            | 0.11                    |
